# Supplementary material for: A reduction in voluntary physical activity in early pregnancy in mice is mediated by prolactin
Source: eLife. 2021 Sep 16;10:e62260. doi: 10.7554/eLife.62260 (PMC8480982; doi:10.7554/eLife.62260)
Supplement: Source data 1. [file elife-62260-supp1.xlsx]

## Sheet: Sheet1
	Figure 4: source data 1
		Prlrlox/lox																Prlrlox/lox/Camk2aCre
	mouse no.	1	2	3	4	5	6	7	8	9	10	11	12	13	14	15		1	2	3	4	5	6	7	8	9	10	11	12
days before mating	np4	7267	13066	6645	18040	10251	10290	13935	11637	4292	4242	8498	1319	13768	8194	7432		4059	8496	6782	9008	6667	10255	3999	4897	2742	7730	1470	2536
	np3	10124	9313	6297	17380	11116	6625	10390	10937	5655	3733	11813	8042	6320	8748	3615		4407	6493	8379	8955	4714	10399	3353	5263	2803	6992	1209	3382
	np2	5487	10916	5932	16592	14218	10377	10856	11132	5938	5869	8658	7993	7896	15103	4480		5593	7589	10571	6182	3187	9947	7646	8110	2367	5099	1226	3011
	np1	7629	8992	5290	15172	9052	9424	10832	12876	9417	7684	10928	10659	8255	4953	5165		6530	7678	8767	5933	4087	8645	9452	6932	2198	3347	831.8	2449
day of pregnancy	1	6262	6651		7530	8096	10411	5944	6727	1441	916.4	4548	3469	5307		8239			5009	7088		3829	6250	8252	4965	2644		907.3	6347
	2	4967	4217	4325	6200	6047	6314	5467		2084	605.4	5009		4938	4548	6698		4015	4935	6325	6467		7083	7557	7085	2411		712	7218
	3	5243	5208	4092	6789	3705		4959	6109	2487	704.3	5785		5212	5009	5369		3745	5207	6499	6464	3730	8169	7683	7941	3064		1044	7609
	4	4412	3851	4767		4599	6636	5025	5944	1855	503.9		4410	4650	5785	3915		3479	7317		5919	3419	8224			3119		992.6	7552
	5	4776	3635	5108	4868		5494	4868	6661	1513	760.3		2437	4209		6187		2541		4326	4960	3309	8999			2449		945.3	6975
	6			5552	4035	4628	5319		5025	1423	1020		3018	3924		6346		2064	6789	3497	3416	2398	8513	7878	4721	3899		997	4988
	7	4374	4706		4325	4092	4480	5319		1395	828.2	4346	2623	4618		4362			5470	4227	3761	3458	8777	8104	4907	2600		823.2	4757
	8	4315	4746	4527	5028	3023	4112	6204	6224	2234	1155		2453	4584		4719		2969	6312	3607		3701	10258	8690	5758	1952		823.2	4127
	9	4799	3927	5026	4432	3174	2878	4964	5467	1432	1300	3854	2193	3591	3332	3192		3080	5840	3660	6340		10369	7466	5045	1778	2616	825	3186
	10	3483	3568	3890		3452		5799	5251	1743	1230	4336	2662	3198		3786		1906	4126	3824	5802	3046	9330	6341	5337	2380	3716	778.4	3988
	11	3676	3299	3096	3628		1541	4767	4959	970.9	1216	2891	2033	2544	2479	2358		2319			4886	2298	7351	7587	5523	1686	3639	740.1	3807
	12			1767	2297	1817	1258		3795	1055	747	2963	2389	1819	2631	3293		2482	2968	2101	4002	1734	7767	5700	3620	1395	545.4	542	2971
	13	1971	1702		1858	1228	929.7	3058	2885	823.5	754.5	1681	1122	1267	2499	3570			2560	2434	4000	2136	8474	5812	3296	1458	2361	543.6	3851
	14	1875	1368	958.3	874.5	1268	575.8	2128		557	974.9	1441	1189	849	1391	2088		1833	2277	2128	4094	2110	8184	5909	2889	1176	2971	532.8	2672
	15	1154	630.3	1156	728.2	1264	496.6	728.9	2046	441	534	1238	798.3	541.8	903.7	2697		1622	1639	1608		1060	7244	4220	1689	1063	2018	581.2	1859
	16	1045	439.9	866.9		287.9	342.8	547.9	1162	476	449.3	1052	632	588.8	447	1291		672.9	1092	1130	1853		6647	4591	2000	813.8	1087	352.5	1718
	17	749.5	486.9	549	724.9			900.8	654.9	364.8	419.7	1010	731.1	252.5	306.7			1042		1098	1652	805.1	4984	2843	2216	709	1116	294.4	1606
	18				710.8	421.5	431.6		763.9	342.1	229.4	490	657.4	295.5	425.9	492		1348	893.6		2003	1275	4210	2756	2000	527	1337	213.8	1319
	Figure 4: source data 2
		Prlrlox/lox											Prlrlox/lox/CSlc32a1Cre
	mouse no.	1	2	3	4	5	6	7	8	9	10		1	2	3	4	5	6	7	8
days before mating	np4	4352.8	5045.6	10280.5	8542.4	8009.6	13044	3758.3	5224	8558.27	10862		12728	11838	10102	5746.3	4982.8	7345	9023.1	10092
	np3	9769.4	11730	11723.8	5740.6	10015	11847	7129	3020.4	8816.17	12835		9700	13265	7890.4	6640.7	9374.2	6033.5	10474	14508
	np2	12482	14028	12984.1	4317.1	8885.9	9717.7	7469.6	2869.4	11385.4	12425		11106	13583	9883.5	7204.5	9432.7	8252.7	13053	14833
	np1	14705	12134	15363.3	7569.7	8243.3	13140	4355	8851.6	10006.3	16164		13117	13952	8582.1	11757	9209.9	12514	11355	14522
day of pregnancy	1	7332.8	7005.5	8937.85	3732.6	6415.6	11820	3287.3	6245.5	6894.84	9273.9		9603.8	12704	7669.4	9738.3	6507	7922.2	10758	12020
	2	6053.5	5337.5	7552.75	4722.7	4200.4	9234.4	2173	5578.4	5995.52	7878.3		9372.5	9045.5	12991	7609.8	6625.1	9871.6	7630	10195
	3	5793.1	6556.9	6797.47	4180.9	3873.9	7686.3	2103.3	5553.1	5795.66	7539.3		7996.2	10709	11700	7361.3	6126.3	9243.1	7945.7	9981.8
	4	6384.3	4702.5	8433.9	4466.6	4305.1	7978.2	2199	8922.7	5995.52	8308.8		7467.3	9495.6	10825	5359.8	5103.8	7738	6652.2	8857.7
	5	5930.4	5639.1	7300.99	4374.1	5370.3	8097	1637	5749.6	5995.52	7718		7576.3	7492.4	10097	6601.7	4132.1	7374.6	3878.9	10359
	6	5279.8	4558.3	6042.2	3932.7	4620.1	6064.2	2488.3	4645.4	5140.6	6871.4		7856.5	9260.8	9562	5430.3	4465.5	7114.6	3482.3	12435
	7	4884.3	3575.9	6042.2	3559.6	4642.1	3901	2039	8922.7	1761.57	6356.6		7219.7	11414	9688.8	7338.5	3544.1		4836.8	11262
	8	8357.1	3514.1	6208.67	4196.1	4429.8	5667.6	1788.7	5923.7	2352.86	12202		5659	11052	7548.4	5574	3787.9	5768.7	5512.3	10585
	9	5877.1	4427.2	5751.03	3854.4	3883.6	3927.7	1981.9	6974.1	1698.36	11290		6032.5	12384	8192.7	3969.2	3332.8	5648.4	3380.8	7807.64
	10	4946.6	2556.2	6413.1	3242.9	3525	5403.9	1859.8	6129.6	2556.93	12917		6464	10149	6455	5186.8	3558.9	4842.6	3686.8
	11	5252.6	2323.6	5460.62	2656.6	3304.6	6572.4		2459	1515.6	5896.6		6464	9889.7	6341.6	4394.7	4380.6	4260.4		7589.9
	12	2596.3	2696	4952.77	2702.9	3092.6	5302.4	2012.2	4857.4	1268.54	4661.6		6096.3	6183	5373.2	3068	3436.1	4066	3068.8	5579.1
	13	2457.6	2848.8	4252.77	2603.9	1645.3		1702.3					5820.7	6854.5	4102.5	3166.3	2309.2	2629.9	2534.5	4165.4
	14	1955.9	1431.1	2166.84	1506.6	1431.8	1956.6	1181.1	1547	791.389	1199.9		5038.4	4480.3	3466.4	710.12	1954.1	2421.5	1774.2	2189.2
	15	1082.5	1088.3	1453.11	1734.5	1224.1	1796.2	701.45	1257.7	629.572	1142.5		4702.1	5289.4	3762.3	771.88	1496.5	772.61	1239.6	1835.6
	16	1209.3	505.32	780.915	1315.9	722.04	1119	467.75	926.84	589.117	765.02		3182.9	2745.8	2144.8	660.27	822.09	1346.2	527.35	967.29
	17	937.31	676.53	827.148	803.31	576.84	628.85	534.21	589.48	409.601	284.99		3152.6	2631.3	2251	986.08	840.51	666.05	364.09	279.93
	18	414.66	607.9	206.245	700.73	634.63	1077.1	510.01	517.76	625.237	213.9		4629.5	1427.1	1549.2	748.05	600.68	389.73	264.76	579
	Figure 5: source data 1
		Prlrlox/lox									Prlrlox/lox/Kiss1Cre
	mouse no.	1	2	3	4	5	6	7	8		1	2	3	4	5	6	7	8
days before mating	np4	756.714	3419.48	3392.03	4109.73	3743.11	10940.4	9988.27	9949.25		5034.4	3106.68	4794.21	3574.43	2876.6	10034.5	6845.1	4485.38
	np3	1121.16	5743.8	3372.16	8576.69	2752.34	4192.45	14869.5	15662.4		8801.36	2720.56	5000.81	3216.85	4616.5	11076.9	12738.8	3281.86
	np2	594.896	8402.96	4711.85	10246.2	3304.98	5511.91	7739.43	6261.76		5926.57	4741.11	5932.71	2450.38	4462.63	8990.27	8924.53	3385.89
	np1	1476.95	6687.98	4636.73	13505.3	3328.82	5749.94	7221.83	7485.51		6009.65	1241.08	7705.84	2851.67	7578.7	8642.07	9490.53	4328.98
day of pregnancy	1	497.011	6043.24	3077.78	5446.17	808.004	3367.47	5659.64	3670.15		4845.14	1893.41	5135.18	2161.78	4610.36	9059.98	8212.6	3668.35
	2	493.5	4938.33	2171.17	4911.96	1990.57	2882.74	3846.42	2476.39		2672.88	1457.44	4962.53	1490.31	4494.05	7731.49	7118.17	1896.66
	3	523.11	4340.54	1766.99	3975.37	2614.37	2576.8	3265.25	2731.76		2131.8	920.699	5838.8	1684.64	3272.11	6713.98	4962.89	2844.81
	4	592.2	4759.89	3456.68	5967.75	3085.73	2608.95	3328.46	2651.93		2306.99	1428.18	3661.48	1977.93	4050.5	5423.06	6077.91	2073.29
	5	513.24	3584.19	2248.83	6297.88	3237.07	2088.46	2900.07	2407.04		1760.49	870.492	3444.4	1479.11	3528.92	4384.61	5406.08	462.336
	6	424.41	3779.24	1545.21	4696.32	2935.83	2051.26	2565.6	1881.13		2672.16	633.184	3574.8	1467.56	3409.37	4361.13	5181.05	112.333
	7	444.15	3358.44	1954.09	3941.78	2362.61	2171.9	2946.67	3602.97		2350.69	957.541	3404.31	1302.85	3034.8	4010.4	4796.74	103.665
	8	449.746	2370.19	3937.8	3149.66	2431.24	2019.47	2190.32	3183.98		2092.43	567.445	2888.16	1422.04	3482.33	3359.16	4364.02	119.196
	9	505.64	2577.16	3126.19	3800.19	2696	2632.43	1287.32	2373.81		1621.79	1078.54	2887.07	1206.05	3813.55	3689.3	3955.86	45.15
	10	433.293	2446.77	2791.72	2793.16	2640.73	1128.03	2327.57	2832.17		1494.28	735.764	2764.62	1318.38	2361.89	3300.65	3428.51	16.9764
	11	375.06	2244.5	2633.15	2463.02	1976.49	979.213	2331.18	2763.9		1600.48	763.216	2212.35	1207.49	1929.89	2811.22	3641.62	1984.07
	12	330.137	1420.96	1671.27	1686.08	1744.23	1825.51	3039.5	3075.98		1815.03	676.528	1798.78	1093.71	2148.06	3053.22	2548.27	1418.07
	13	335.194	1384.12	1409.76	1416.27	1848.98	1300.68	2106.52	2054.51		1451.66	666.053	1838.87	1091.91	1322.71	1845.37	2386.81	218.165
	14	282.458	592.007	1323.44	886.023	1231.69	873.381	1886.19	1381.23		935.508	869.047	1215.44	757.075	1954.82	1755.07	2479.28	967.632
	15	251.395	1395.32	1336.44	686.28	1115.75	1016.78	1254.81	884.579		986.437	818.841	1119.36	950.317	980.658	922.866	1985.45	1076.01
	16	226.472	1584.58	866.519	561.666	1027.97	783.442	995.828	526.991		734.681	802.948	789.944	477.145	1091.55	694.949	1614.96	541.874
	17	296.545	812.339	910.585	532.409	1026.17	575.031	787.055	590.923		495.205	769.717	640.046	754.186	776.581	27.8125	789.944	464.463
	18	134.005	637.157	771.884	87.0492	1228.8	351.448	649.438	552.636		566.723	656.301	1054.51	677.972	471.366	968.594	591.284	503.169
	Figure 6: source data 1
		Prlrlox/lox + control MPOA injecton									Prlrlox/lox/Kiss1Cre + AAV-Cre MPOA injection
	mouse no.	1	2	3	4	5	6	7	8		1	2	3	4	5	6	7	8	9
days before mating	np4	5626	23738	12052.5	24186	24456	7449	12192	15019.7		9630	11820	7992	10350	13724	13232.1	6109.32	10203.4	10685.4
	np3	4682.83	8640	17823	5448	6394	4611	15576	17089.7		18432	12150	18828	18105	13672	21825.4	5755.25	16377.6	11030.4
	np2	13853.2	10666	28533	7461	5396	8763	9948	24018.3		18312	14040	3642	15100	12572	11836.9	6385.38	22665.8	16800.6
	np1	24041.9	12914	6573	8166	7342	29487	11028	12145.7		17898	19080	4830	15725	8448	8584.35	5875.27	14721.5	18050.6
day of pregnancy	1	3256.05	3222	5454	3030	4054	3336	7290	7447.59		15162	11235	10596	13570	17696	17012.7	6631.44	10719.4	15955.5
	2	5773.19	4158	2961	4959	4140	3084	5730	5202.07		8478	11785	13020	23190	26276	8824.39	6655.44	11307.4	13400.4
	3	11155.9	7214	5757	10557	7858	2670	10920	4755.06		8490	10135	12624	13660	9056	10966.7	7393.6	9108.33	5070.17
	4	6572.18	4100	3985.5	5073	4576	5745	4854	7698.1		6366	12035	10860	10765	8292	9142.44	10004.2	15060.5	8130.27
	5	4664.81	2352	2439	2838	3734	4092	4566	7864.6		6942	8655	10938	13650	10592	8743.38	7813.69	17214.6	7765.26
	6	5433.76	3624	2793	3930	5676	3543	4374	6615.08		7248	12135	8574	13110	9316	9238.45	7213.56	7596.27	7690.26
	7	6043.52	3832	3556.5	3705	5512	2208	5184	6043.58		9045.41	6455	17580	12635	8488	9118.43	7261.57	8517.31	8270.28
	8	4667.81	4998	4228.5	3555	4552	1740	5652	6187.58		7281.56	7985	9222	13840	6148	9637.52	6919.5	7182.26	4115.14
	9	3826.76	3794	4195.5	3630	6354	2082	6144	5148.06		7045.07	6550	9582	12105	5128	8041.26	9590.08	3024.11	7705.26
	10	4508.61	3458	3081	2178	4178	1563	4938	5454.07		8237.45	11810	10638	13910	7660	8524.34	8191.77	4896.18	8205.27
	11	3688.59	3708	4080	2766	4138	705	5466	4869.06		7896.83	3750	9246	11340	9184	14174.2	7195.56	5433.2	10740.4
	12	2913.63	2610	5673	3687	5808	1731	5280	3609.05		7379.82	5540	10458	10630	8068	10678.7	8143.76	3864.14	7605.25
	13	2342.92	1222	3876	1632	2272	1557	4566	3120.04		6945.23	1550	9108	8750	5452	10009.6	9205.99	5859.21	11015.4
	14	1742.17	730	3571.5	2127	3140	1416	3948	1545.02		4520.75	2975	7896	5995	3668	6027.95	5479.19	708.026	6075.2
	15	651.811	354	3781.5	924	1662	1062	3462	144.002		3982.32	2775	6072	7590	2508	3750.59	5713.24	1896.07	4195.14
	16	729.909	308	3808.5	294	784	297	3114	24.0003		4072.76	1460	4956	7520	2180	2487.39	5929.28	2382.09	9450.32
	17	285.355	222	3349.5	423	328	708	2832	30.0004		2871.94	1415	4506	3060	1160	1566.25	4609	1671.06	6830.23
	18	456.568	136	2194.5	600	366	1485	2124	52.5007		2170.96	650	4020	2475	940	897.141	3576.77	1710.06	4095.14
